# Supplementary material for: Creation of highly stable monomeric Pd(II) species in an anion-exchangeable hydroxy double salt interlayer: Application to aerobic alcohol oxidation under an air atmosphere
Source: Royal Society of Chemistry journal article supplement (doi:10.1039/b918350g), 2009-01-01
Supplement: b918350g.pdf [file b918350g.pdf]

*Electronic Supplementary Information for*

**Creation of Highly Stable Monomeric Pd(II) Species in an Anion-exchangeable Hydroxy Double Salt Interlayer: Application to Aerobic Alcohol Oxidation under an Air Atmosphere**

Takayoshi HARA, Masakazu ISHIKAWA, Junya SAWADA, Nobuyuki ICHIKUNI  
and Shogo SHIMAZU\*

*Department of Applied Chemistry and Biotechnology,  
Graduate School of Engineering, Chiba University  
Yayoi 1-33, Inage, Chiba 263-8522, Japan  
TEL&FAX: +81-43-290-3379  
E-mail: shimazu@faculty.chiba-u.jp*

**Table of Contents**

|                                                                                                                   |   |
|-------------------------------------------------------------------------------------------------------------------|---|
| 1. Materials                                                                                                      | 2 |
| 2. XRD profiles of synthesized Pd/NiZn catalysts ( <b>Fig. 1S</b> )                                               | 2 |
| 3. XRD profiles for the HT-supported Pd catalysts ( <b>Fig. 2S</b> )                                              | 3 |
| 4. IR spectra for the Pd/NiZn catalysts ( <b>Fig. 3S</b> )                                                        | 4 |
| 5. Curve-fitting result of the $[\text{Pd}(\text{OH})_4]^{2-}$ species in the aqueous solution ( <b>Fig. 4S</b> ) | 5 |
| 6. Curve-fitting result for the synthesized Pd/NiZn catalysts ( <b>Fig. 5S</b> )                                  | 6 |
| 7. Hot filtration experiment ( <b>Fig. 6S</b> )                                                                   | 7 |
| 8. Screening of reaction conditions ( <b>Table 1S</b> )                                                           | 8 |
| 9. Hammett plot ( <b>Fig. 7S</b> )                                                                                | 9 |

### 1. Materials

$\text{Ni}(\text{OAc})_2 \cdot 4\text{H}_2\text{O}$  and  $\text{Zn}(\text{OAc})_2 \cdot 2\text{H}_2\text{O}$  were obtained from Wako Pure Chemical Ind. Co. Ltd.  $\text{K}_2\text{PdCl}_4$  purchased from Aldrich was used without further purification. Alcohols as a substrate and solvents were purchased from Wako Pure Chemical Ind. Co. Ltd., Tokyo Kasei, and Aldrich.

### 2. XRD profiles of the synthesized Pd/NiZn catalysts

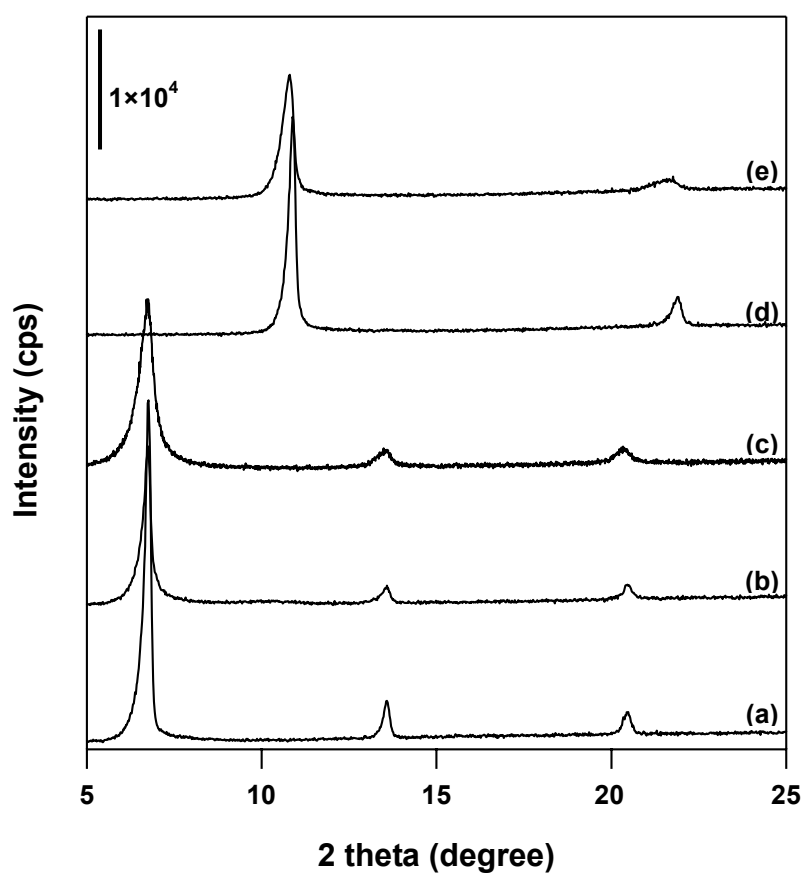

**Figure 1S.** XRD profiles for (a) NiZn, (b) fresh Pd/NiZn(0.02), (c) recovered Pd/NiZn(0.02), (d) fresh Pd/NiZn(1) and (e) NiZn treated with excess NaOH aq.

### 3. XRD profiles for the HT-supported Pd catalysts

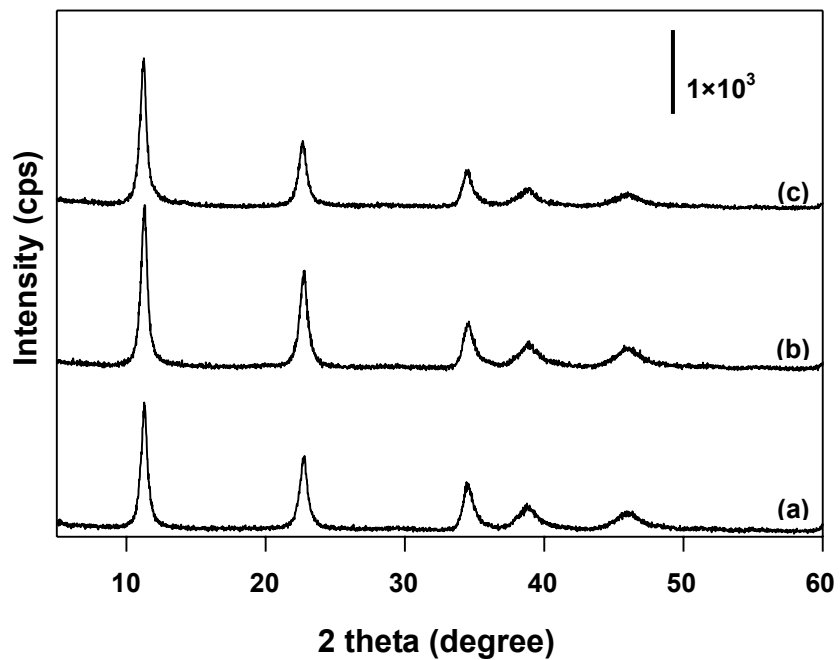

**Figure 2S.** XRD profiles for (a) fresh Pd/HT(0.02), (b) recovered Pd/HT(0.02) and (c) parent-HT.

#### 4. IR spectra for the Pd/NiZn catalysts

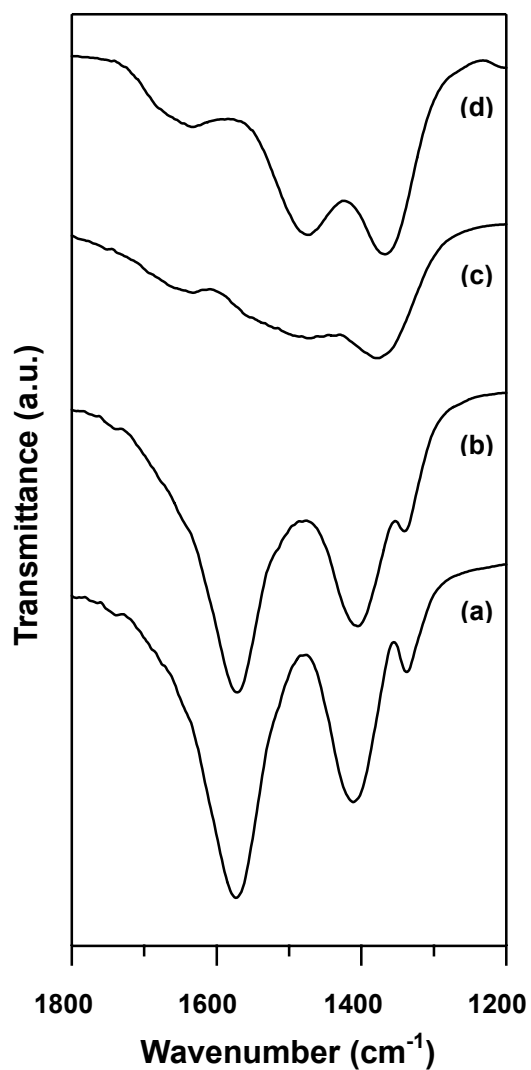

**Figure 3S.** IR spectra for (a) NiZn, (b) fresh Pd/NiZn(0.02), (c) fresh Pd/NiZn(1) and (d) NiZn treated with excess aqueous NaOH.

**5. Curve-fitting result of the  $[\text{Pd}(\text{OH})_4]^{2-}$  species in the aqueous solution**

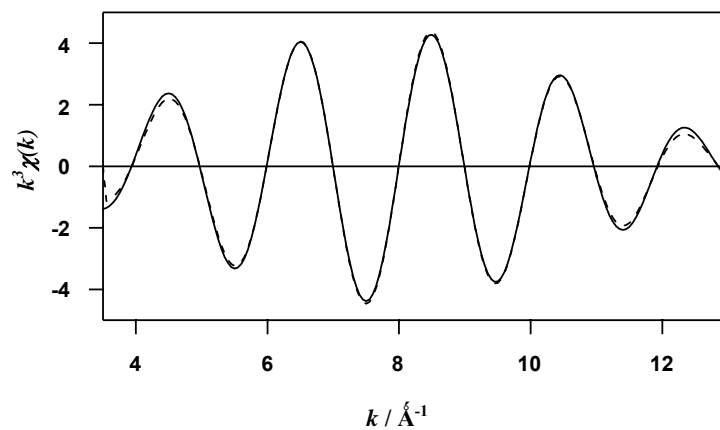

**Figure 4S.** Curve-fitting of Fourier-filtered EXAFS of aqueous  $[\text{Pd}(\text{OH})_4]^{2-}$  solution. The solid curve is obtained experimentally and the dashed curve is the calculated fit.

### 6. Curve-fitting result for the synthesized Pd/NiZn catalysts

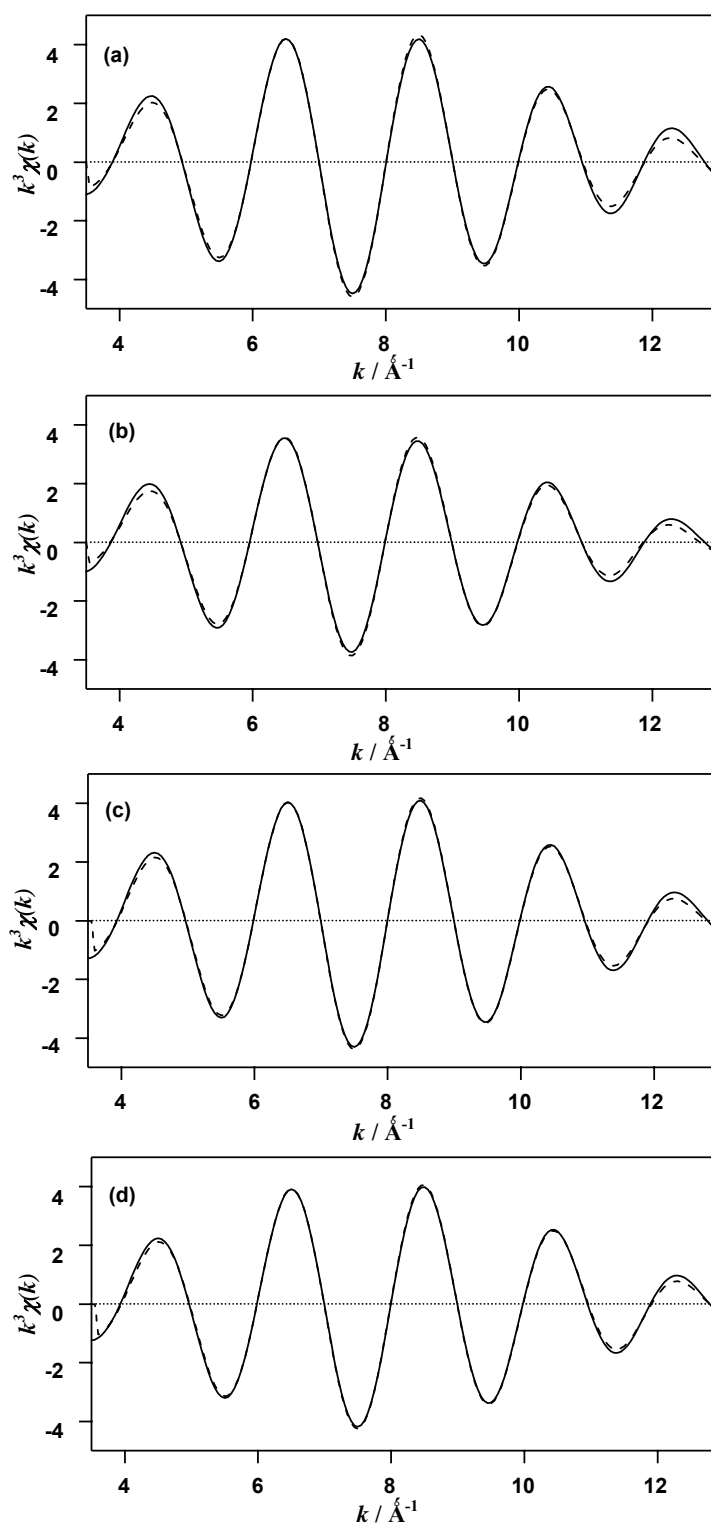

**Figure 5S.** Curve-fitting of Fourier-filtered EXAFS of (a) fresh Pd/NiZn(0.02) and (b) recovered Pd/NiZn(0.02), (c) fresh Pd/NiZn(1) and (d) Pd/NiZn(1). The solid curve is obtained experimentally, and the dashed curve is the calculated fit.

### 7. Hot filtration experiment

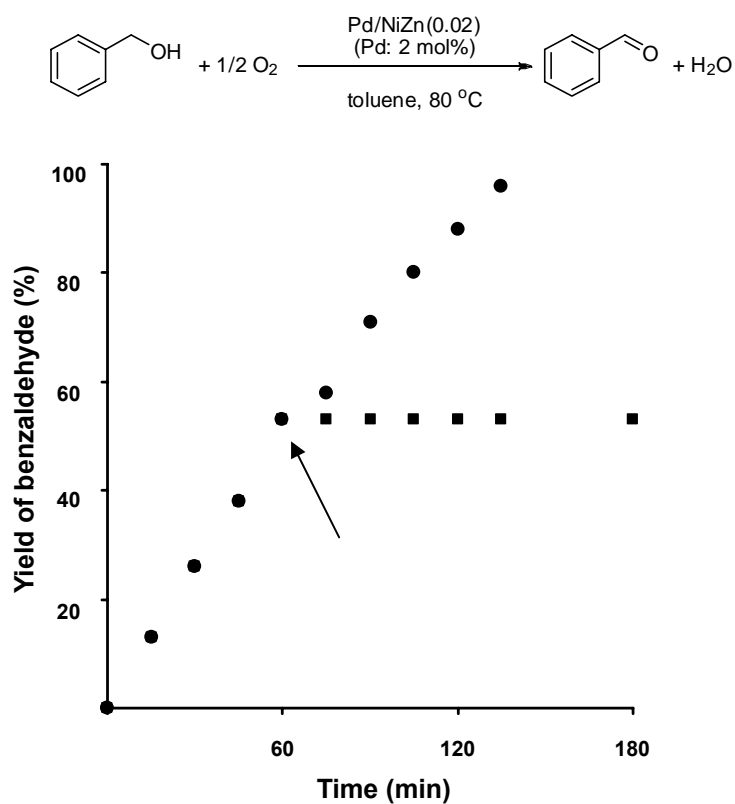

**Figure 6S.** Effect of removal of the Pd/NiZn(0.02) catalyst on the aerobic benzyl alcohol oxidation: without removal of Pd/iZn(0.02) (●); an arrow indicates the removal of the Pd/NiZn(0.02) (■). Reaction conditions: benzyl alcohol (0.5 mmol), Pd/NiZn(0.02) (Pd: 2 mol%), toluene (2.5 mmol), 353 K, O<sub>2</sub> atmosphere..

## 8. Screening of reaction conditions

**Table 1S** Screening of reaction conditions for benzylalcohol oxidation<sup>a</sup>

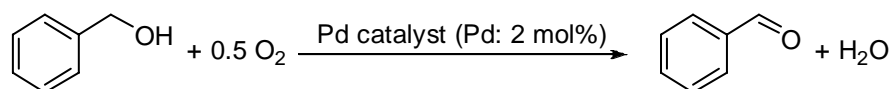

| Entry | Pd catalyst                           | Solvent                              | Conv <sup>n</sup> <sup>b</sup> (%) | Yield <sup>b</sup> (%) |
|-------|---------------------------------------|--------------------------------------|------------------------------------|------------------------|
| 1     | Pd/NiZn(0.02)                         | PhCF <sub>3</sub>                    | >99                                | 97                     |
| 2     | Pd/NiZn(0.02)                         | toluene                              | 81                                 | 79                     |
| 3     | Pd/NiZn(0.02)                         | ClCH <sub>2</sub> CH <sub>2</sub> Cl | 79                                 | 71                     |
| 4     | Pd/NiZn(0.02)                         | n-heptane                            | 58                                 | 50                     |
| 5     | Pd/NiZn(0.02)                         | ethyl acetate                        | 47                                 | 42                     |
| 6     | Pd/NiZn(0.02)                         | acetonitrile                         | trace                              | trace                  |
| 7     | Pd/NiZn(0.02)                         | DMF                                  | trace                              | trace                  |
| 8     | Pd/NiZn(0.02)                         | DMSO                                 | trace                              | trace                  |
| 9     | Pd/NiZn(0.02)                         | ethanol                              | 47                                 | 41                     |
| 10    | Pd/NiZn(0.02)                         | water                                | trace                              | trace                  |
| 11    | Pd(OAc) <sub>2</sub>                  | toluene                              | 8                                  | 8                      |
| 12    | K <sub>2</sub> PdCl <sub>4</sub>      | toluene                              | 0                                  | 0                      |
| 13    | PdCl <sub>2</sub> (PhCN) <sub>2</sub> | toluene                              | trace                              | trace                  |
| 14    | NiZn                                  | PhCF <sub>3</sub>                    | trace                              | trace                  |
| 15    | none                                  | PhCF <sub>3</sub>                    | 0                                  | 0                      |

<sup>a</sup> Reaction conditions: benzylalcohol (0.5 mmol), Pd catalyst (Pd: 2 mol%), solvent (2.5 mL), 353 K, 1 h, O<sub>2</sub> balloon. <sup>b</sup> Determined by GC analysis using an internal standard technique.



### 9. Hammett plot

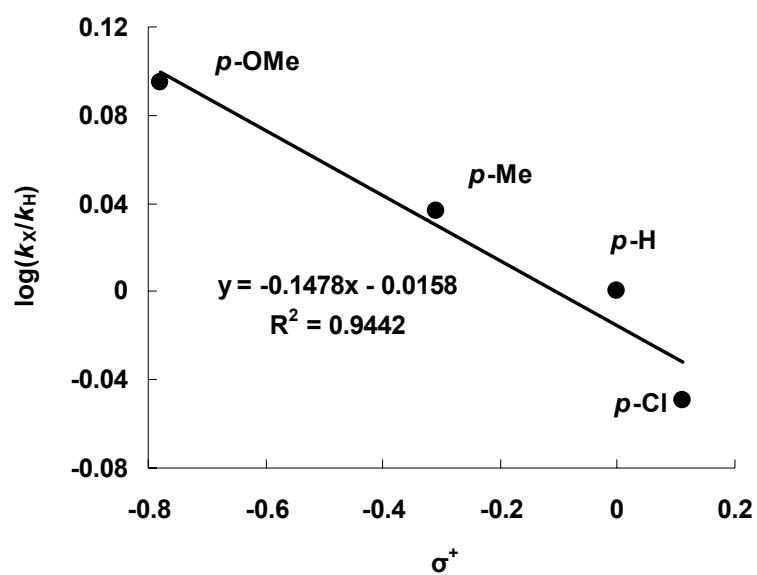

**Figure 7S.** Hammett plots for competitive oxidation of benzyl alcohol and *p*-substituted benzyl alcohols.  $\log(k_X/k_H)$  versus Brown-Okamoto  $\sigma^+$ .<sup>1</sup> Reaction conditions: benzyl alcohol (0.5 mmol), *p*-substituted benzyl alcohol (0.5 mmol), Pd/NiZn(0.02) (Pd: 2 mol%), PhCF<sub>3</sub> (2.5 mL), 353 K, air flow (1 atm, 20 mL/min).

[1] H. C. Brown, Y. Okamoto, *J. Am. Chem. Soc.*, 1958, **80**, 4979.
